# Supplementary material for: LC-MS/TOF Characterization and Stability Study of Artesunate in Different Solvent Systems
Source: MDPI journal article supplement (doi:10.3390/separations9080218), 2022-08-13
Supplement: s1 [file s1]

# LC-MS/TOF Characterization and Stability Study of Artesunate in Different Solvent Systems

Kogila Oke and Amos Mugweru \*

Department of Chemistry and Biochemistry, Rowan University, Glassboro, NJ 08028, USA

\* Correspondence: mugweru@rowan.edu; Tel.: +1-856-2565454; Fax: +1-856-256-4478

## Supplementary

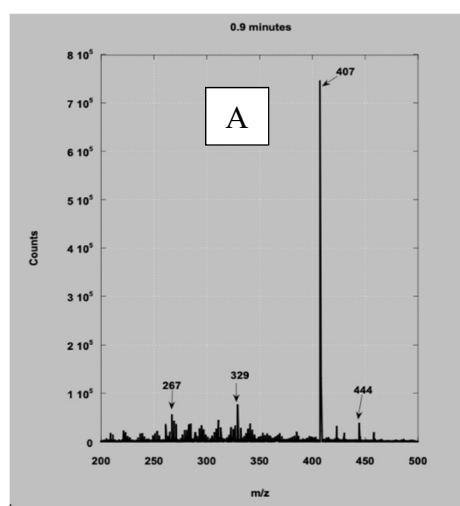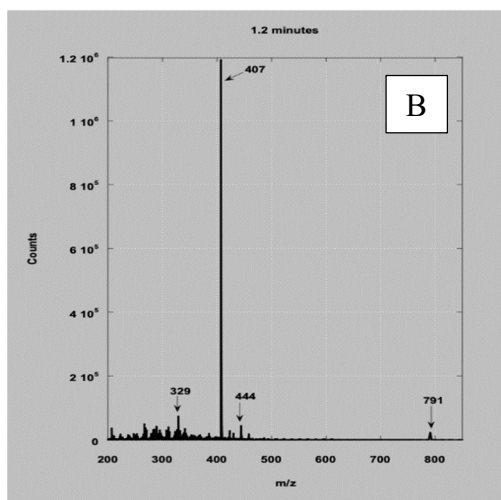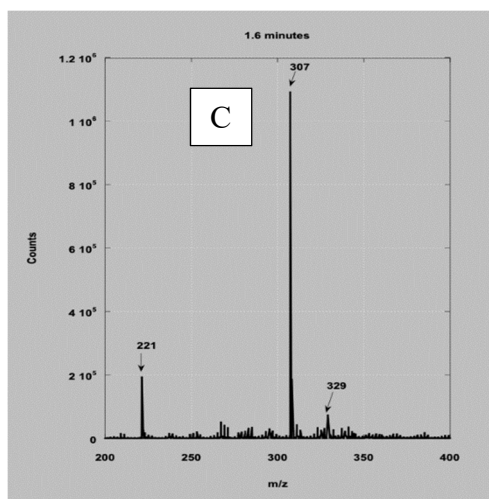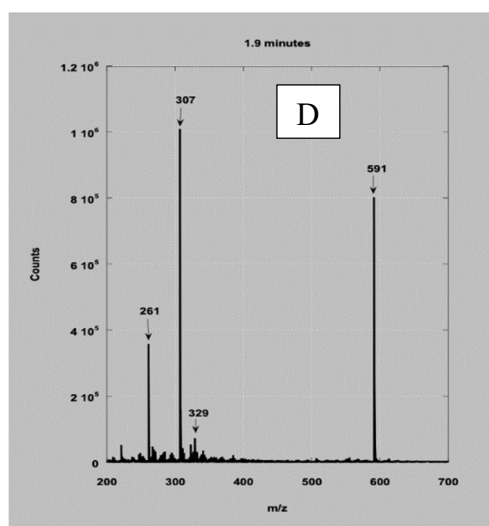

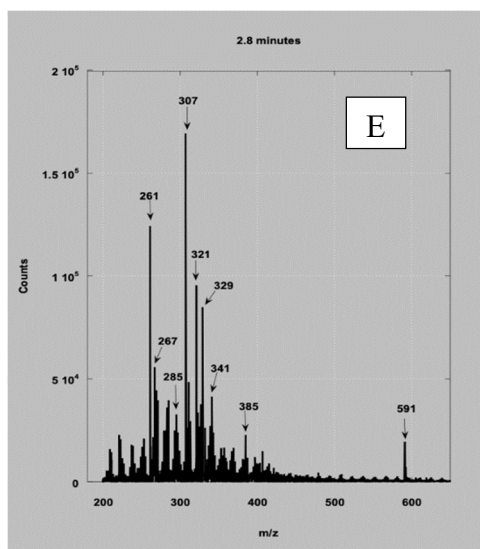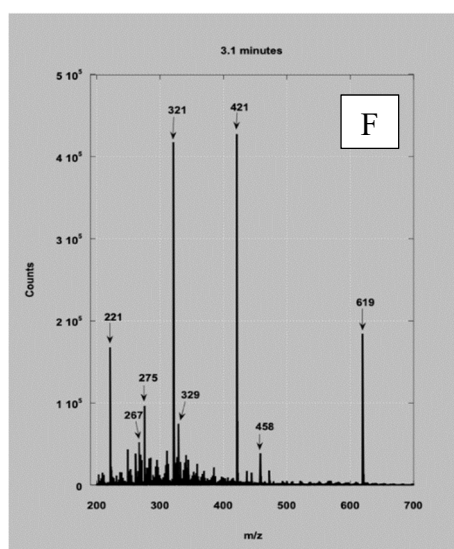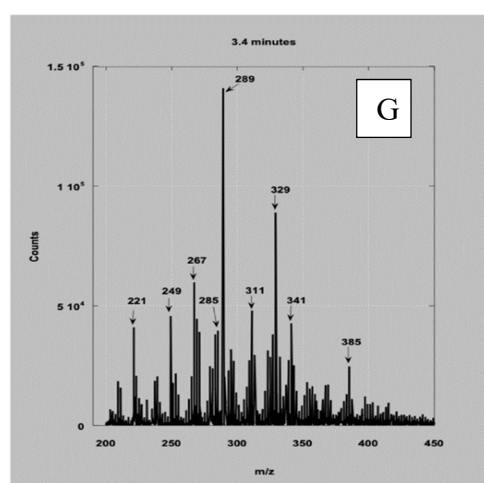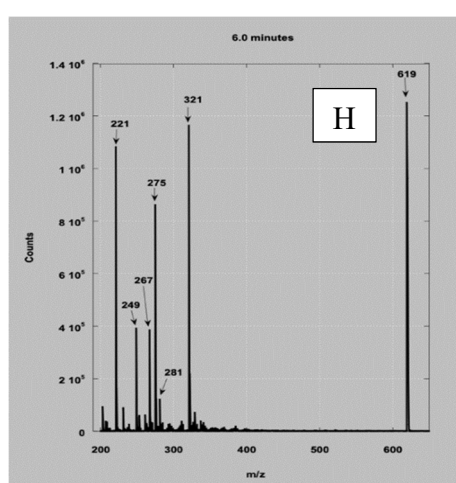

Figure S1. Mass spectrum of artesunate reaction products in methanol at 0.9mins (A), 1.2mins (B), 1.6mins (C), 1.9mins (D), 2.8mins (E), 3.1mins (F), 3.4mins (G) and 6.0mins (H).

**Table S1.** Identification of mass fragments of artesunate reaction products in methanol.

| Retention time (min) | Main mass fragments (m/z) | Identification                                                                                             |
|----------------------|---------------------------|------------------------------------------------------------------------------------------------------------|
| 0.9                  | 407                       | 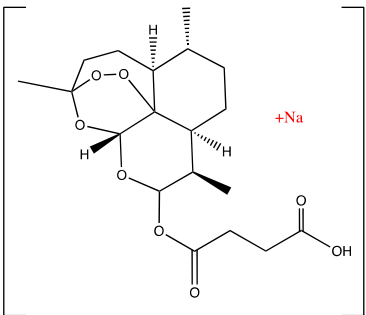 <p>Artesunate 407</p>   |
| 1.2                  | 791                       |  <p>Artesunate 791</p>  |
| 1.6                  | 307                       |  <p>Artesunate 307</p> |
| 1.9                  | 591                       |                        |

|     |               |                                                                                                                                                                                                                                                                                                          |
|-----|---------------|----------------------------------------------------------------------------------------------------------------------------------------------------------------------------------------------------------------------------------------------------------------------------------------------------------|
|     |               | Artesunate 591                                                                                                                                                                                                                                                                                           |
| 2.8 | 285, 321, 385 | <div data-bbox="900 271 1276 591"> </div> <div data-bbox="999 611 1177 645">Artesunate 285</div> <div data-bbox="916 674 1270 987"> </div> <div data-bbox="999 1005 1177 1039">Artesunate 321</div> <div data-bbox="916 1070 1260 1364"> </div> <div data-bbox="999 1404 1177 1438">Artesunate 385</div> |
| 3.1 | 619           | <div data-bbox="857 1464 1374 1751"> </div> <div data-bbox="999 1769 1177 1803">Artesunate 619</div>                                                                                                                                                                                                     |

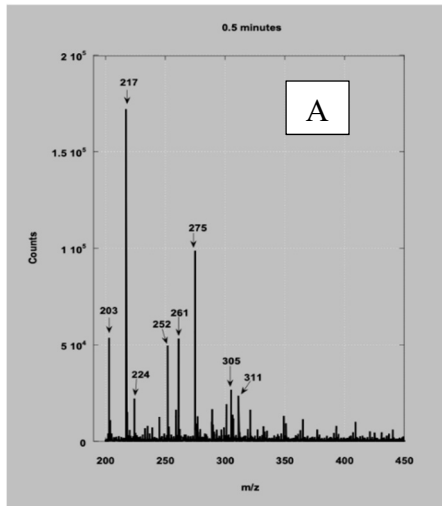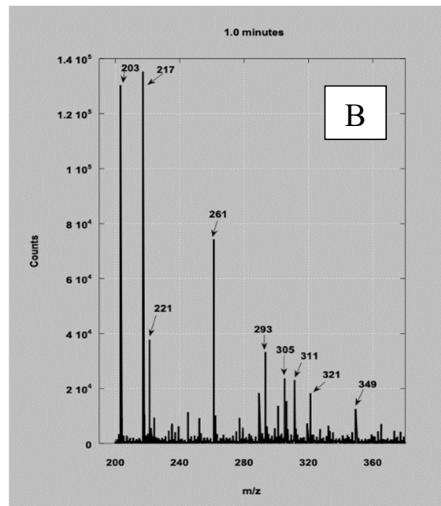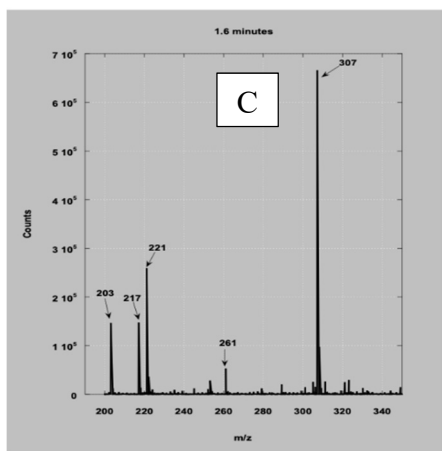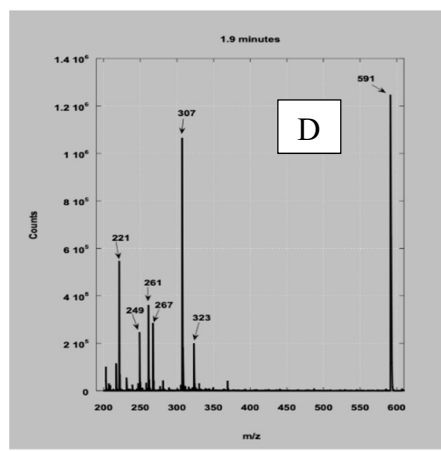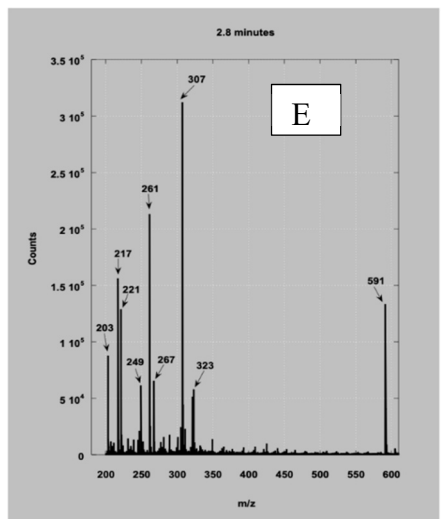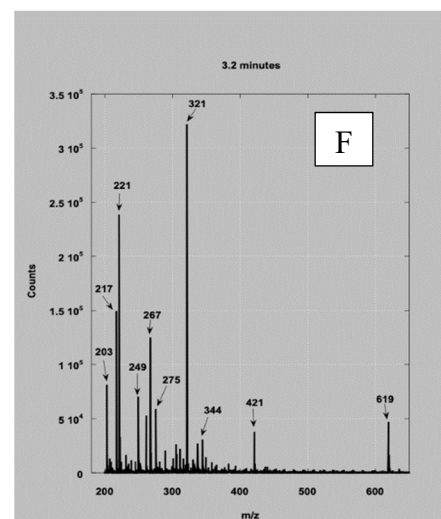

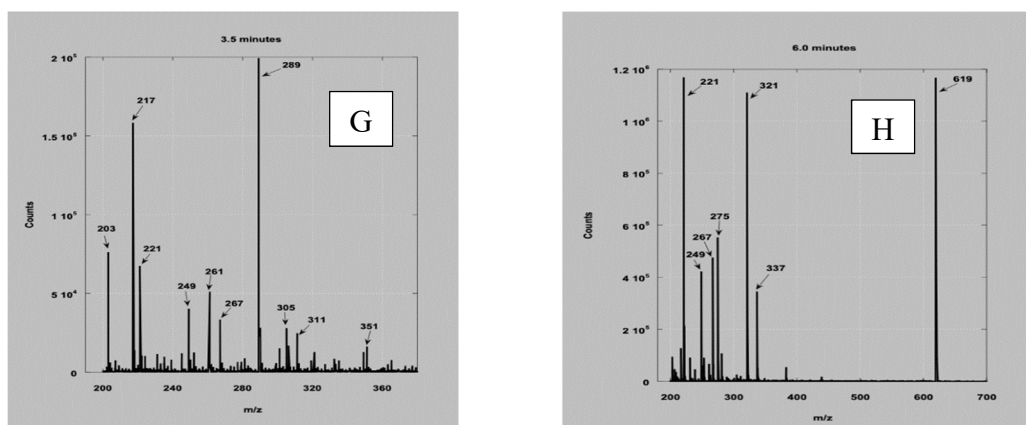

**Figure S2.** Mass spectrum of reaction products in methanol:water at 0.5mins (A), 1.0mins (B), 1.6mins (C), 1.9mins (D), 2.8mins (E), 3.2mins (F), 3.5mins (G) and 6.0mins (H).

**Table S2.** Identification of mass fragments of artesunate reaction products in methanol:water.

| Retention time<br>(min) | Main mass<br>fragments ( $m/z$ ) | Identification                                                                                             |
|-------------------------|----------------------------------|------------------------------------------------------------------------------------------------------------|
| 0.5                     | 305                              | 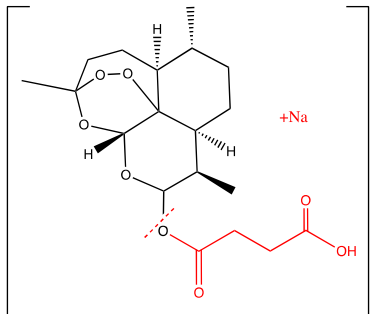 <p>Artesunate 305</p>  |
| 1.0                     | 305*, and 321                    |  <p>Artesunate 321</p> |
| 1.6                     | 307                              |  <p>Artesunate 307</p> |

|     |                |                                                                                                                                                                                                                      |
|-----|----------------|----------------------------------------------------------------------------------------------------------------------------------------------------------------------------------------------------------------------|
| 1.9 | 307*, 591      | 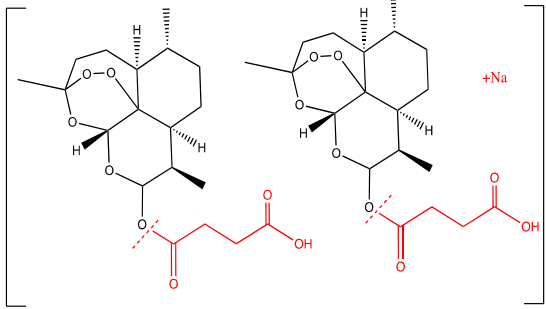 <p>Artesunate 591</p>                                                                                                             |
| 3.2 | 321*, 344, 619 |  <p>Artesunate 344</p>  <p>Artesunate 691</p> |

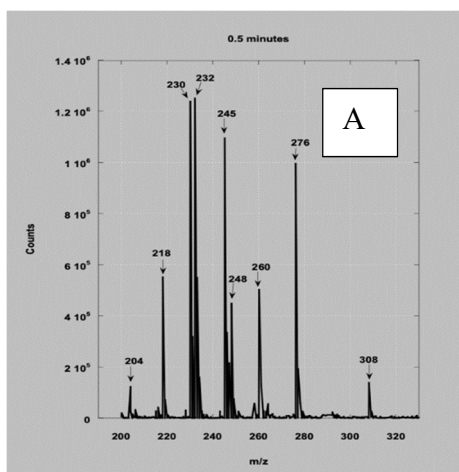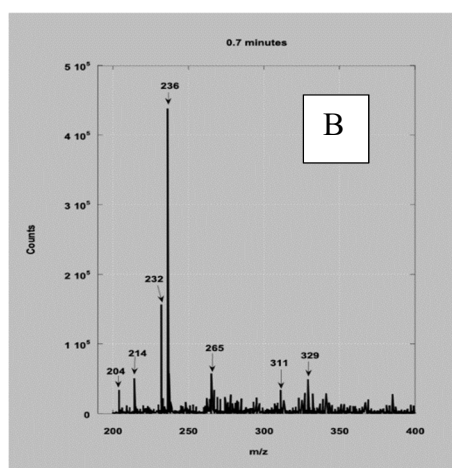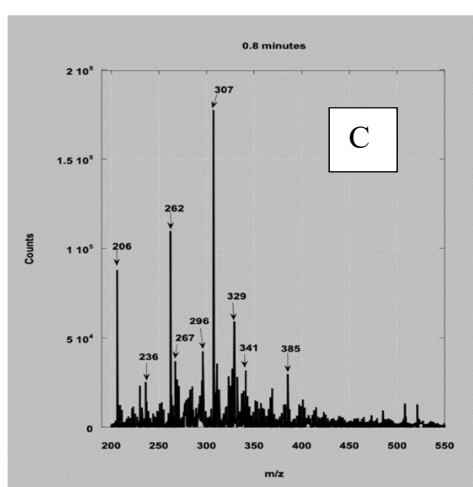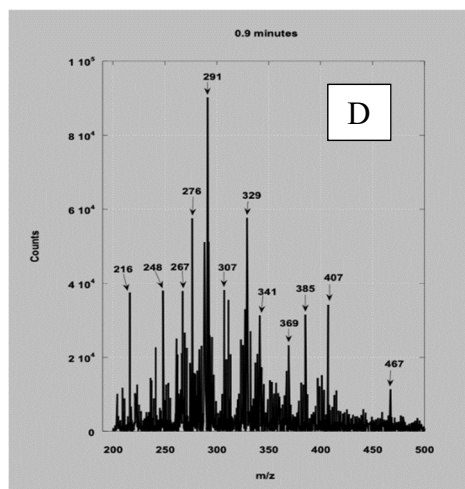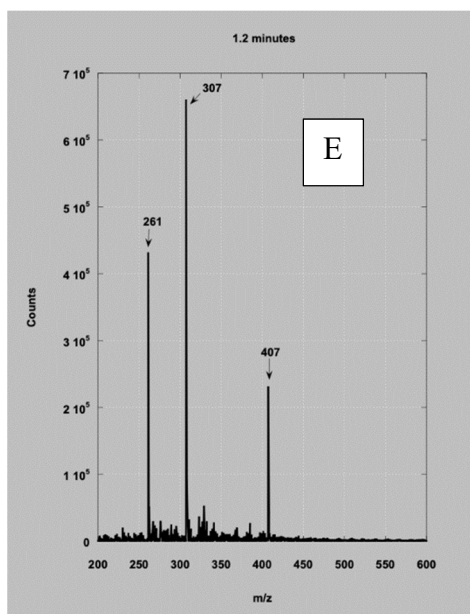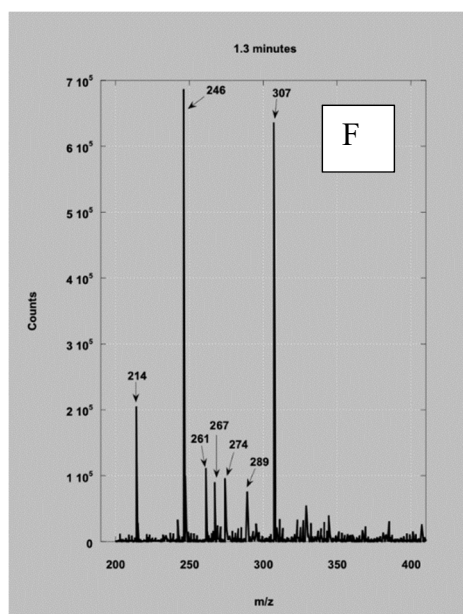

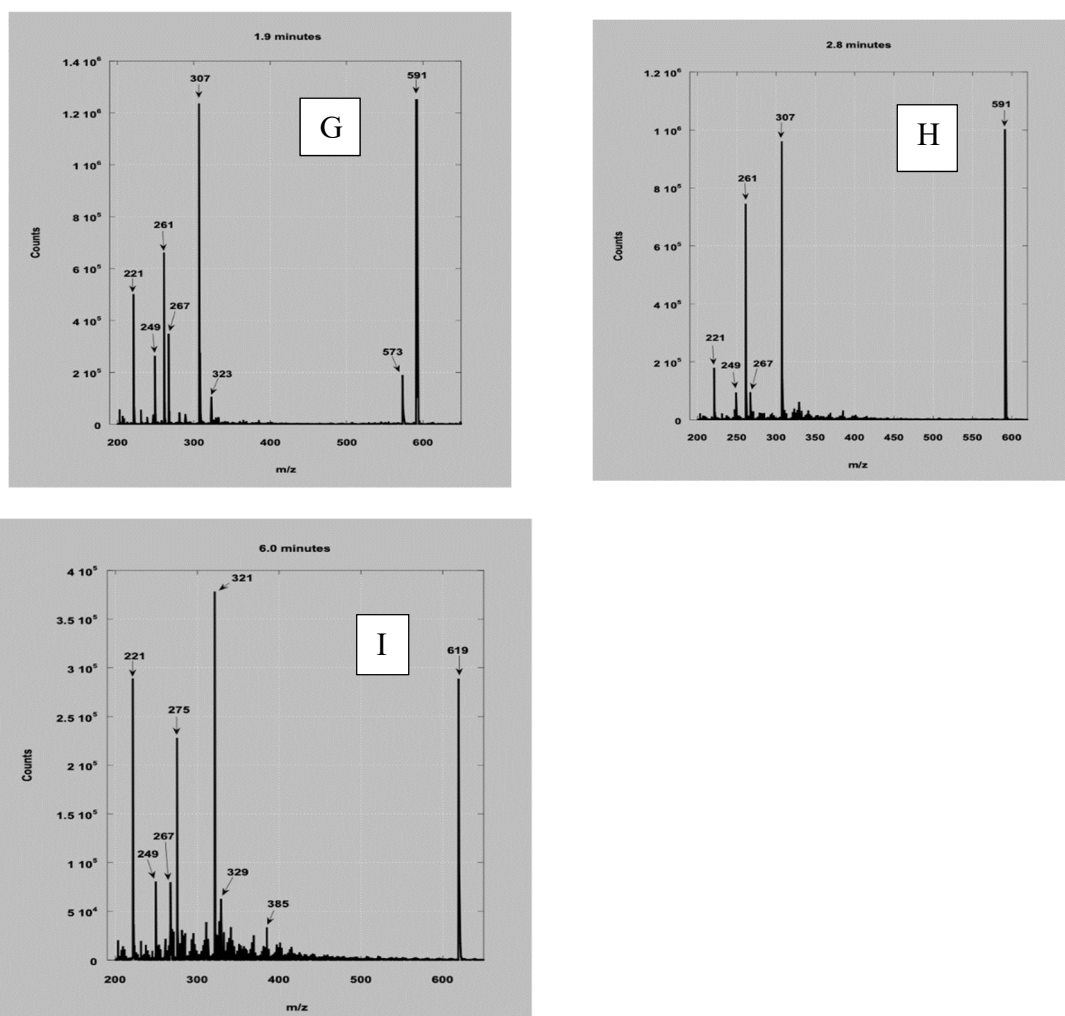

**Figure S3.** Mass spectrum of artesunate reaction products in 20 mM Ammonium Acetate: methanol at 0.5mins (A), 0.7mins (B), 0.8mins (C), 0.9mins (D), 1.2mins (E), 1.3mins (F), 1.9mins (G), 2.8mins (H), and 6.0mins (I).

**Table S3.** Identification of mass fragments of artesunate reaction products in 20 mM Ammonium Acetate: methanol.

| Retention time (min) | Main mass fragments (m/z) | Identification                                                                                             |
|----------------------|---------------------------|------------------------------------------------------------------------------------------------------------|
| 0.5                  | 308                       | 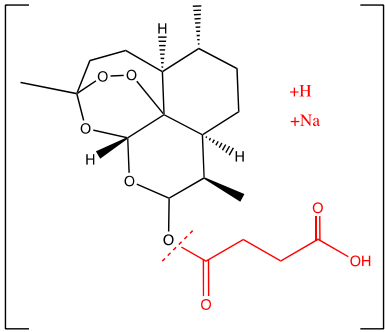 <p>Artesunate 308</p> |

|     |                 |                                                                                                                                                                                                                     |
|-----|-----------------|---------------------------------------------------------------------------------------------------------------------------------------------------------------------------------------------------------------------|
| 0.7 | 265             | <p>Addition of H to 282 gives m/z 283. Removal of water from m/z 283 resulted in fragment ion m/z 265.</p> 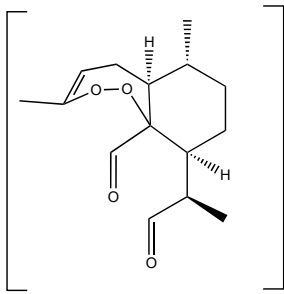 <p>Artesunate 265</p> |
| 0.8 | 307             |  <p>Artesunate 307</p>                                                                                                           |
| 0.9 | 307*, 407       |  <p>Artesunate 407</p>                                                                                                          |
| 1.9 | 267*, 307*, 591 |  <p>Artesunate 591</p>                                                                                                          |

|     |              |                                                                                                                                |
|-----|--------------|--------------------------------------------------------------------------------------------------------------------------------|
| 6.0 | 321, and 619 | 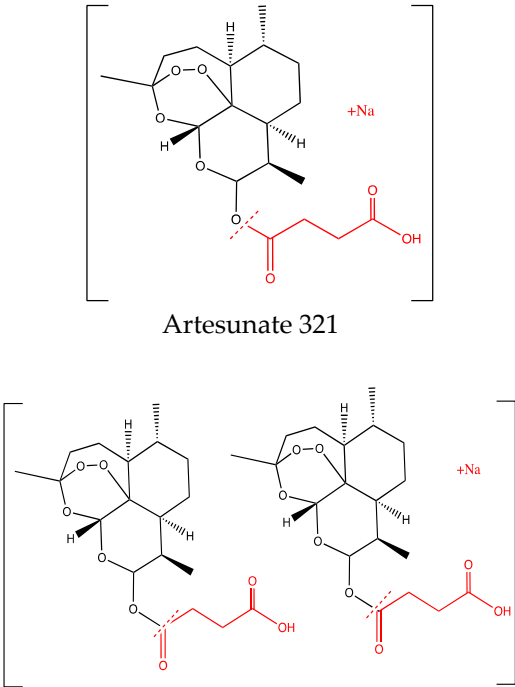 <p>Artesunate 321</p> <p>Artesunate 619</p> |
|-----|--------------|--------------------------------------------------------------------------------------------------------------------------------|

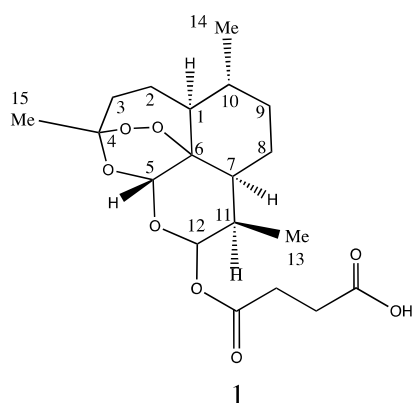

artesunate

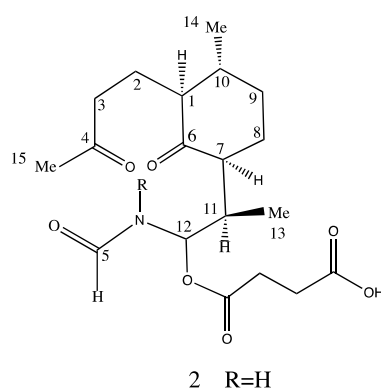

conjugated artesunate

**Figure S4.** Mechanism of conjugation between artesunate and nitrogen in 20 mM Ammonium Acetate : Methanol at 37°C.
